# Supplementary material
Source: publisher site journal article supplement (https://www.dovepress.com/article/503133)

**FigureS1. Effect of glucose stimulation on podocyte differentiation**

Immortalized podocytes (undifferentiated, UD) transferred to 37˚C, 5% CO2, and interferon-γ free incubators to induce differentiation for at least 14 days, then incubated them with 11,15,30 mM glucose for 2 days. The expression of naphrin and podocin in podocytes,(A) representative blots. (B/C) representative of the result of densitometric analysis, (Data are the mean ± S.D; **P* < 0.05 vs UD, ***P* < 0.01 vs UD, n = 3) .

**FigureS1. Effect of glucose stimulation on podocyte differentiation.**


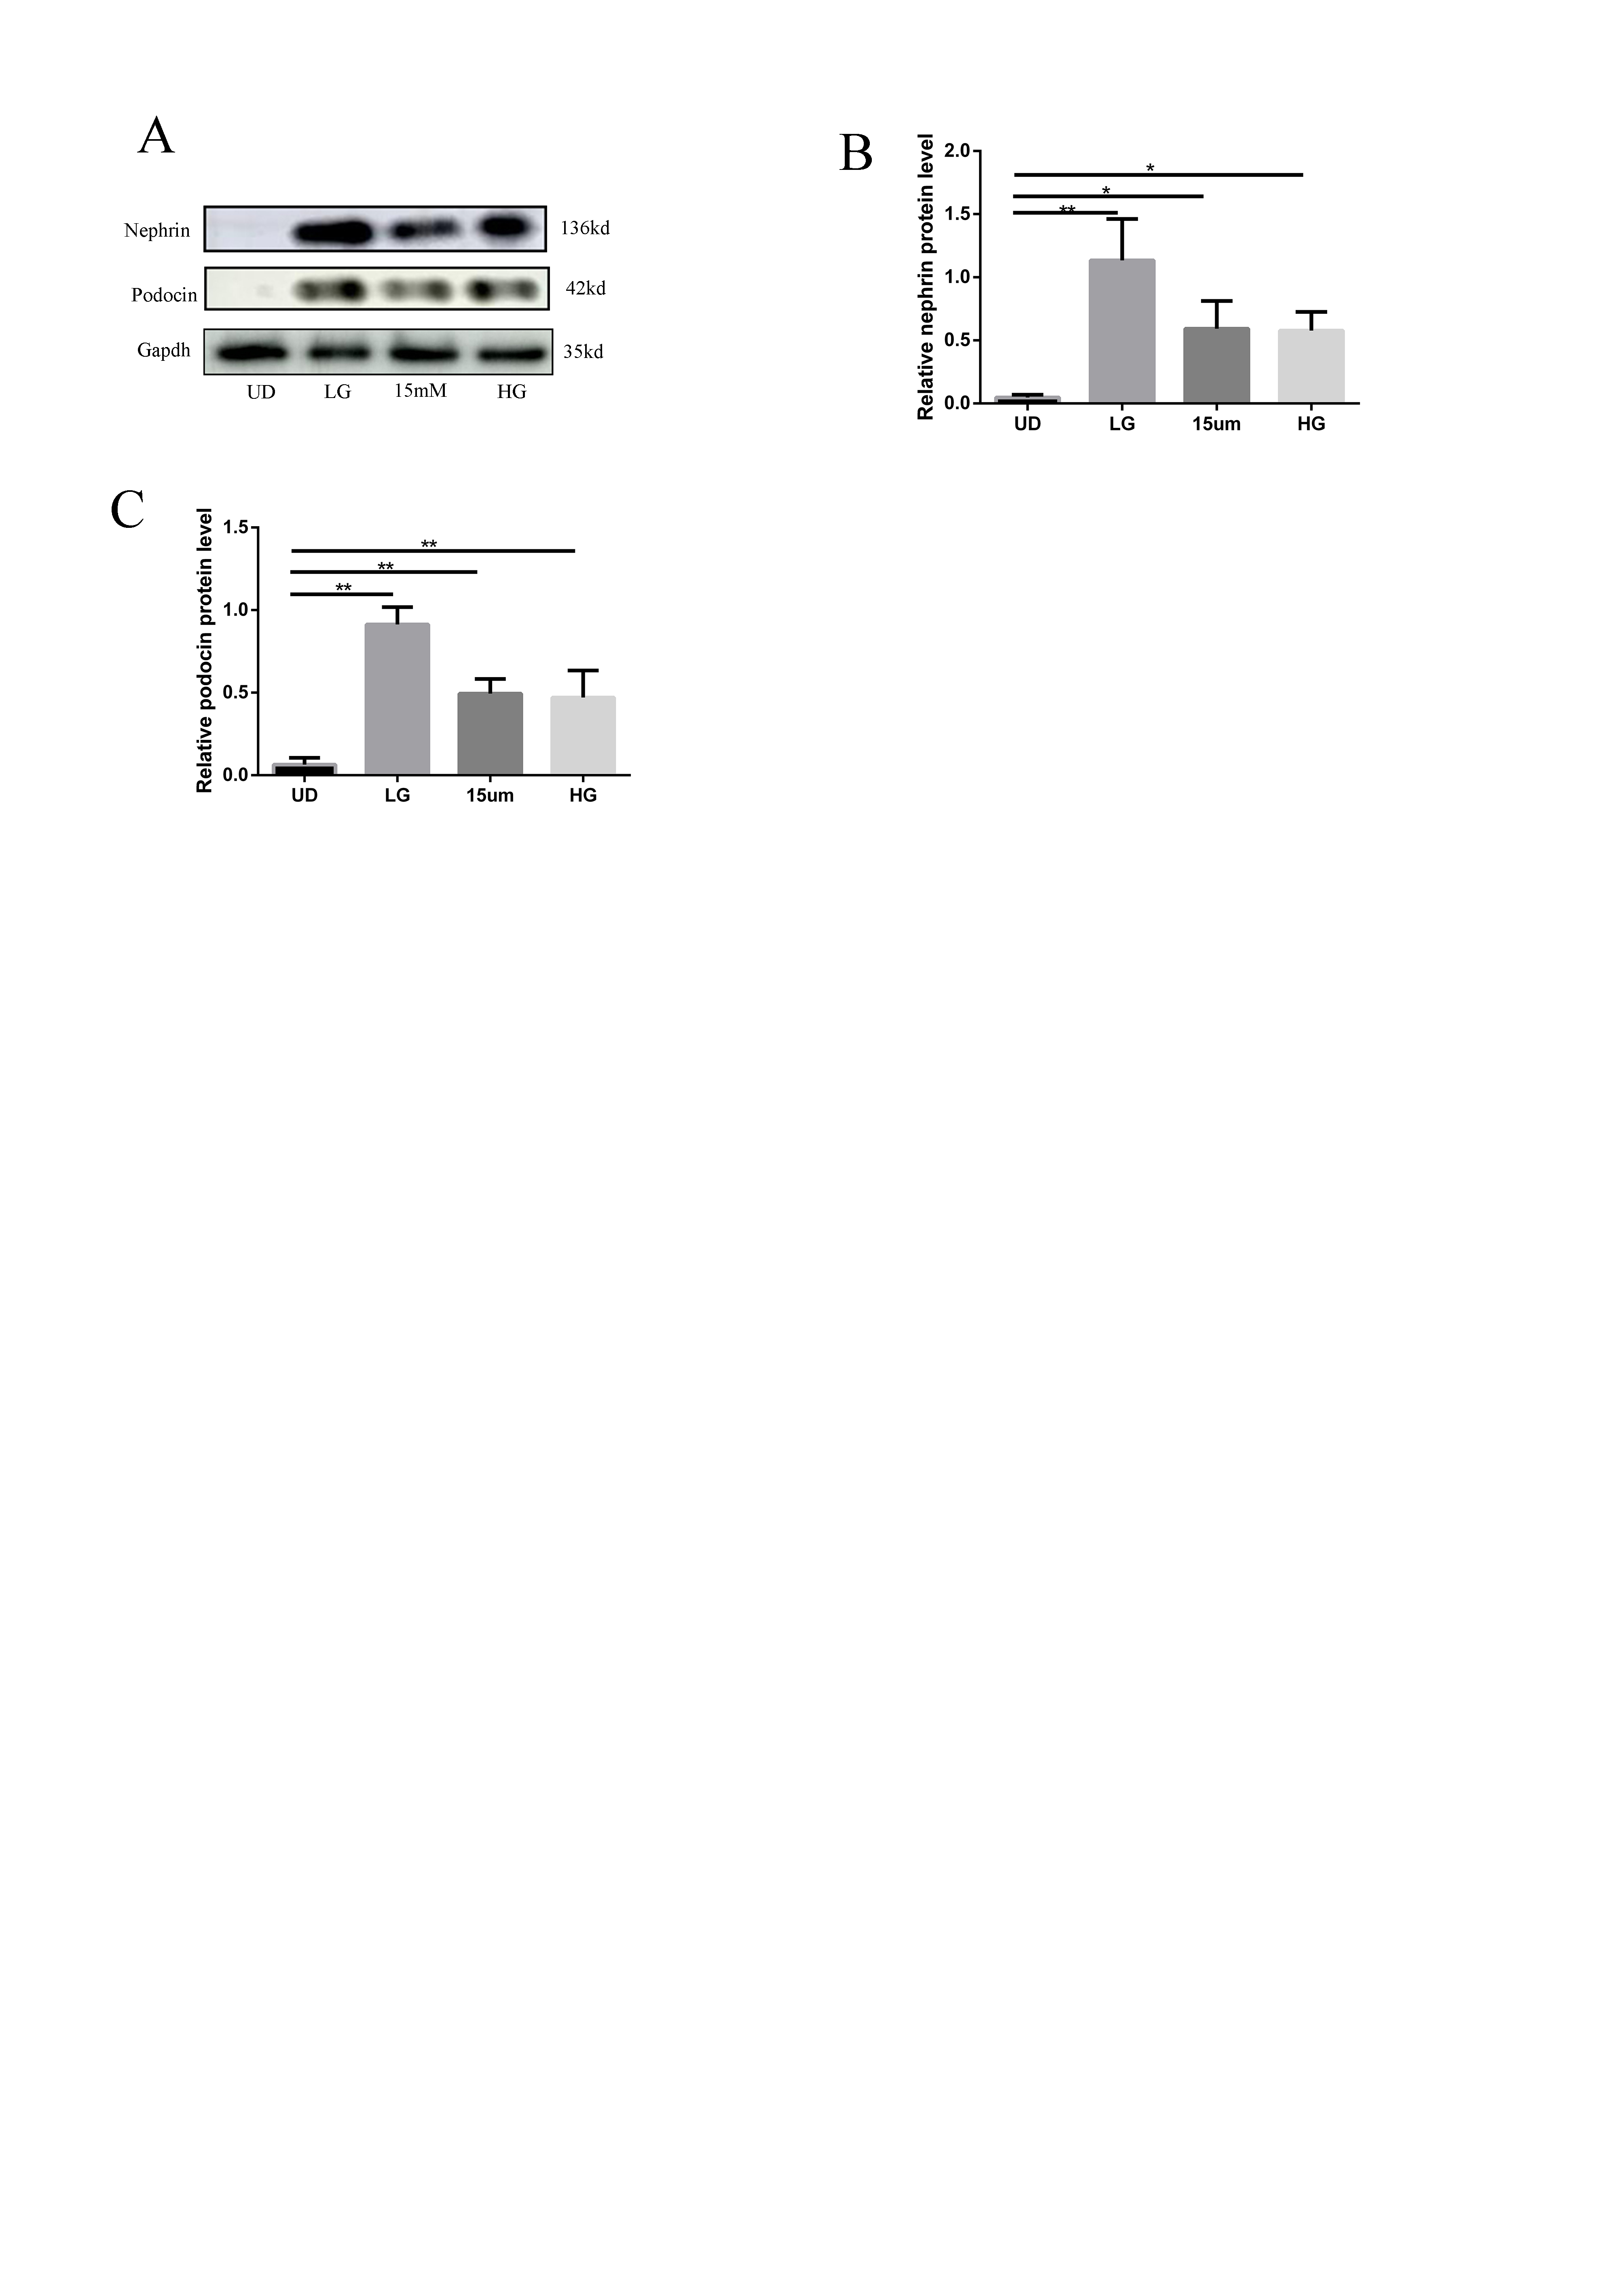

Supplement: Supplementary file 1 [file get_supplementary_file.php]
